# **FORMAL:A model to identify organisms present in metagenomes using Monte Carlo Simulation**

Genivaldo Gueiros Z. Silva<sup>1</sup>, Bas E. Dutilh<sup>4,5</sup>, and Robert A. Edwards<sup>1, 2, 3, 5, 6\*</sup>

<sup>1</sup>Computational Science Research Center, <sup>2</sup>Department of Computer Science, and <sup>3</sup>Department of Biology, San Diego State University, 5500 Campanile Drive, San Diego, CA 92182, USA, <sup>4</sup>Centre for Molecular and Biomolecular Informatics, Radboud Institute for Molecular Life Sciences, Radboud University Medical Centre, Geert Grooteplein 28, 6525 GA, Nijmegen, The Netherlands, <sup>5</sup>Department of Marine Biology, Institute of Biology, Federal University of Rio de Janeiro, Brazil, <sup>6</sup>Division of Mathematics and Computer Science, Argonne National Laboratory, 9700 S. Cass Ave, Argonne, IL 60439, USA

\*For correspondence please contact Dr. Robert Edwards at [redwards@mail.sdsu.edu](mailto:redwards@mail.sdsu.edu).

## **Abstract**

One of the major goals in metagenomics is to identify organisms present in the microbial community from a huge set of unknown DNA sequences. This profiling has valuable applications in multiple important areas of medical research such as disease diagnostics. Nevertheless, it is not a simple task, and many approaches that have been developed are slow and depend on the read length of the DNA sequences. Here we introduce an innovative and agile approach which k-mer and Monte Carlo simulation to profile and report abundant organisms present in metagenomic samples and their relative abundance without sequence length dependencies. The program was tested with a simulated

metagenomes, and the results show that our approach predicts the organisms in microbial communities and their relative abundance.

## Introduction

Microbes are more abundant than any other organism (Whitman, Coleman & Wiebe, 1998), and it is important to understand what those organisms are doing and who they are. In many environments more than 99% of the microbes cannot be cultured (Sharon & Banfield, 2013).

Metagenomics is a powerful tool that makes it possible to study genomes and understand the diversity present in uncultured microorganisms just by using DNA sequences. Metagenomics uses high throughput sequencing – fast and cheap sequencing provided by the next generation of sequencing technologies (Wooley, Godzik & Friedberg, 2010).

The understanding of microbial communities is important in many areas of biology. For example, metagenomes can provide the difference the microbial community in marine animals (Trindade-Silva et al., 2012; Oliveira et al., 2012; Garcia et al., 2013).

It is not an easy task to identify the diversity of organisms present in metagenomes, and there are many approaches that have been developed to identify the organisms present in metagenomes, such as BLAST (Altschul et al., 1990), MEGAN (Huson et al., 2007), MG-RAST (Meyer et al., 2008), and Phymm (Brady & Salzberg, 2009). However, most of these tools are slow and depend on the sequence length.

Sequence composition (k-mer) analyses have been widely used to cluster unknown sequences (Rosen, Reichenberger & Rosenfeld, 2011; Silva et al., 2014), while

Monte Carlo Simulation has been previously used on high dimensional biological data (Manly, 2006; Kerr et al., 2008; Liu, 2008). However, these two approaches have not previously been combined to explore the diversity of microorganisms in different communities.

This paper proposes an approach based in a stochastic model to identify the organisms present in metagenomic samples and their relative abundance using Monte Carlo simulation and k-mer frequency from known microbial genomes.

## Methods

### Calculating k-mer frequency

Given a DNA sequence  $S$ , k-mer counting is a problem, in  $4^k$ - dimensional space of determining the occurrence of substrings of length  $k$ . A metagenome is a finite representation of the members of a community. The community can be considered to be a sample from all microbes. Since we are only concerned with identifying microbes that we know about, we limit the definition of community to be a sample of all *known* microbes (our reference set). Thus, k-mers could be used to predict the organisms that are present in a metagenome: the goal is to match up the organisms in the metagenome from reference dataset. There are several agile tools to count k-mers, and here we use Jellyfish (Marçais & Kingsford, 2011).

### Reference dataset

A group of reference sequences are required to model and identify the organisms that are present in a metagenome. 2,518 complete genomes were downloaded from NCBI (<ftp://ftp.ncbi.nih.gov/genomes/Bacteria>) on 16 November 2013, and we manually selected 1 genome to represent each genus; a total of 655 genera. K-mer frequencies ( $k=6-8$ , default:  $k=7$ ) were calculated and normalized by the sum of frequencies.

## Monte Carlo Simulation

Monte Carlo methods are used as an alternative to understand the behavior in high dimensional random samples (Mooney, 1997). This method is implemented in a computer program by defining a pseudo-population under conditions from the real world. For example, we consider metagenomes as the real problem world where  $M$  is a random metagenome with  $n$  organisms defined as the convex combination.

We present in the sub-section “stochastic modeling” the pipeline to profile a metagenome using Monte Carlo methods.

## Distributions for biological populations

As used in PHACCS (Angly et al., 2005), our tool assumes three biological rank-abundance distributions: power (zipf) law, exponential, and log-normal distributions. The first two forms are empirical distributions used to model an asymptotic drop-off in the abundance (Ulrich, 2001) and the last form appears to be the most commonly present among species rank distribution (Pielou, 1975).

## Simulated data

The program was tested using simulated data based in complete bacterial genomes (Table 1). In order to evaluate our approach performance, a medium complexity dataset, 507,808 single 100 nt reads using the supplied error model for pyrosequencing, was sampled from ten species using Grinder (Angly et al., 2012). The ten selected species are not present into the reference dataset.

| NCBI accession number | Strain name                                    | Relative abundance (%) |
|-----------------------|------------------------------------------------|------------------------|
| NC_021003.1           | <i>Streptococcus pneumoniae</i> SPN032672      | 22.85                  |
| NC_016842.1           | <i>Treponema pallidum</i> SamoaD               | 16.30                  |
| NC_015758.1           | <i>Mycobacterium africanum</i> GM041182        | 15.09                  |
| NC_015566.1           | <i>Serratia</i> AS12                           | 10.55                  |
| NC_009455.1           | <i>Dehalococcoides</i> BAV1                    | 8.11                   |
| NC_018887.1           | <i>Borrelia afzelii</i> HLJ01                  | 7.33                   |
| NC_020411.1           | <i>Hydrogenobaculum</i> HO                     | 7.11                   |
| NC_008600.1           | <i>Bacillus thuringiensis</i> Al Hakam         | 5.86                   |
| NC_008369.1           | <i>Francisella tularensis</i> holarctica OSU18 | 4.92                   |
| NC_015866.1           | <i>Rickettsia heilongjiangensis</i> 054        | 1.87                   |

**Table 1** – simulated metagenome.

## Stochastic modeling

To model the data the program follows the pipeline depicted below

- 1) K-mer frequency for the input data:** a script written in Python language calculates the k-mer frequency for the user input data.

- 2) **Select G genomes:** the algorithm selects G genomes randomly among the 655 reference genomes.
- 3) **Approximate distribution:** calculate the approximate distribution of the genomes in metagenomes using k-mer frequencies applies a biological distribution on the k-mer frequency of each genome and create a single vector with the sum of G genomes k-mer frequencies.
- 4) **Frequencies distance:** calculate the distance between the G genomes selected and the metagenome using the Euclidean distance.
- 5) **Repeat:** loop N times on steps 2, 3 and 4.

## Results and discussions

In order to test the tool accuracy, species from the reference dataset were not included in the simulated test set, and the genera were predicted for all the species.

For the propose of evaluating the program, it was initially run 10 times, each time with  $250 \times 10^4$  iterations, from 6 to 8 mers (see Figure 2).

Next, I ran the program with the same parameters, but now with  $250 \times 10^5$  iterations (see Figure 3).

Modeling with  $250 \times 10^4$  and  $250 \times 10^5$  iterations, the stochastic approach predicted about seven or eight of the ten species among the all species in the metagenome. We clearly see in Figures 2 and 3 that when we increased the length of k, the estimation of real abundance and number of correctly predicted organisms increased. I also conclude

that the error in the prediction decreases as the number of iterations increases; however, the program running time increases as the number of iterations increases (see Figure 4).

About two species were not predicted with neither  $250 \times 10^4$  nor  $250 \times 10^5$  iterations, this is probably because either the low abundance of each species in the metagenomic sequences or the presence of other species with similar k-mer frequencies in the reference database.

## Limitations

As with other methods created to profile metagenome sequences, the approach presented here depends on a curated database of microbial reference genomes in order to predict a specific genus. If a reference genome is absent, the tool will predict the closest reference available.

## Conclusions

Here a stochastic model was presented to address the problem of identifying organisms present in metagenomes that does not rely on sequence length. Thus, it can be used on raw sequencing reads and does not require an initial metagenome assembly, which may be difficult for cases with high microdiversity, or computationally costly for very large metagenomic datasets.

## Acknowledgements

I thank Dr Samuel Shen for the Mathematical modeling classes.

*Funding:* This research was funded by the Dimensions: Shedding Light on Viral Dark Matter project supported by the National Science Foundation (NSF) Division of Environmental Biology (DEB-1046413) and by II-EN: Computational Enhancement of Analytical Metagenomics Systems project supported by the NSF Division of Computer and Network Systems (CNS-1305112).

*Conflict of Interest:* none declared.

## **Availability and requirements**

Project home page: <https://edwards.sdsu.edu/formal>

Operating system: the program was developed for Linux but should also run on Windows or Mac command line interpreters (Cygwin, Terminal).

Programming language: Python.

## **References**

- Altschul SF, Gish W, Miller W, Myers EW, Lipman DJ. 1990. Basic local alignment search tool. *Journal of molecular biology* 215:403–410.
- Angly F, Rodriguez-Brito B, Bangor D, McNairnie P, Breitbart M, Salamon P, Felts B, Nulton J, Mahaffy J, Rohwer F. 2005. PHACCS, an online tool for estimating the structure and diversity of uncultured viral communities using metagenomic information. *BMC Bioinformatics* 6:41.
- Angly FE, Willner D, Rohwer F, Hugenholtz P, Tyson GW. 2012. Grinder: a versatile amplicon and shotgun sequence simulator. *Nucleic Acids Research*:gks251.



- Brady A, Salzberg SL. 2009. Phymm and PhymmBL: metagenomic phylogenetic classification with interpolated Markov models. *Nature Methods* 6:673–676.**
- Breiman L. 2001. Random Forests. *Machine Learning* 45:5–32.**
- Garcia GD, Gregoracci GB, Santos E de O, Meirelles PM, Silva GGZ, Edwards R, Sawabe T, Gotoh K, Nakamura S, Iida T et al. 2013. Metagenomic Analysis of Healthy and White Plague-Affected *Mussismilia braziliensis* Corals. *Microbial Ecology* 65:1076–1086.**
- Huson DH, Auch AF, Qi J, Schuster SC. 2007. MEGAN analysis of metagenomic data. *Genome Research* 17:377–386.**
- Kerr RA, Bartol TM, Kaminsky B, Dittrich M, Chang J-CJ, Baden SB, Sejnowski TJ, Stiles JR. 2008. Fast Monte Carlo Simulation Methods for Biological Reaction-Diffusion Systems in Solution and on Surfaces. *SIAM Journal on Scientific Computing* 30:3126–3149.**
- Liu JS. 2008. *Monte Carlo Strategies in Scientific Computing*. Springer.**
- Manly BFJ. 2006. *Randomization, Bootstrap and Monte Carlo Methods in Biology, Third Edition*. CRC Press.**
- Marçais G, Kingsford C. 2011. A fast, lock-free approach for efficient parallel counting of occurrences of k-mers. *Bioinformatics* 27:764–770.**
- Meyer F, Paarmann D, D’Souza M, Olson R, Glass EM, Kubal M, Paczian T, Rodriguez A, Stevens R, Wilke A et al. 2008. The metagenomics RAST server – a public resource for the automatic phylogenetic and functional analysis of metagenomes. *BMC Bioinformatics* 9:386.**
- Mooney CZ. 1997. *Monte Carlo Simulation*. SAGE.**

- Oliveira LS de, Gregoracci GB, Silva GGZ, Salgado LT, Filho GA, Alves-Ferreira M, Pereira RC, Thompson FL. 2012. Transcriptomic analysis of the red seaweed *Laurencia dendroidea* (Florideophyceae, Rhodophyta) and its microbiome. *BMC Genomics* 13:487.
- Pielou EC. 1975. *Ecological diversity*. Wiley.
- Preis T, Virnau P, Paul W, Schneider JJ. 2009. GPU accelerated Monte Carlo simulation of the 2D and 3D Ising model. *Journal of Computational Physics* 228:4468–4477.
- Rosen GL, Reichenberger ER, Rosenfeld AM. 2011. NBC: the Naive Bayes Classification tool webserver for taxonomic classification of metagenomic reads. *Bioinformatics (Oxford, England)* 27:127–129.
- Sharon I, Banfield JF. 2013. Genomes from Metagenomics. *Science* 342:1057–1058.
- Silva GGZ, Cuevas DA, Dutilh BE, Edwards RA. 2014. FOCUS: an alignment-free model to identify organisms in metagenomes using non-negative least squares. *PeerJ* 2:e425.
- Trindade-Silva AE, Rua C, Silva GGZ, Dutilh BE, Moreira APB, Edwards RA, Hajdu E, Lobo-Hajdu G, Vasconcelos AT, Berlinck RGS et al. 2012. Taxonomic and Functional Microbial Signatures of the Endemic Marine Sponge *Arenosclera brasiliensis*. *PLoS ONE* 7:e39905.
- Ulrich W. 2001. Models of relative abundance distributions I: model fitting by stochastic models. 49:145–157.
- Whitman WB, Coleman DC, Wiebe WJ. 1998. Prokaryotes: The unseen majority. *Proceedings of the National Academy of Sciences* 95:6578–6583.

**Wooley JC, Godzik A, Friedberg I. 2010. A Primer on Metagenomics. *PLoS Comput Biol* 6:e1000667.**

## Known

655 bacterial genomes

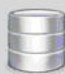

Precalculate k-mer  
frequency for references

## Unknown

User input FASTA file

Reference genomes

Metagenomes

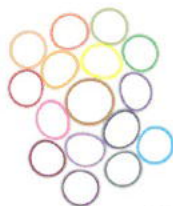

1) Calculate k-mer frequency for the input data

Frequency of k-mer: (A, A, A)=15, (A, A, C)=18, (A, A, G)=9, (A, A, T)=4, (A, C, A)=4, (A, C, C)=7, (A, C, G)=8...

2) Select a k-mer frequency of n random reference genomes

Eubacterium rectale ATCC 33656  
Anoxybacillus flavithermus WK1  
Enterococcus faecium Aus0004  
Akkermansia degerii K4  
Aerobacterium woodii DSM 1030  
Bacillus weihenstephanensis KBAB4  
Clostridium thermocellum ATCC 27405  
Desulfotobacterium hafnense DCB-2  
Halobacterium modesticaldum Jce1

3) Calculate the approximate distribution of genomes in metagenomes

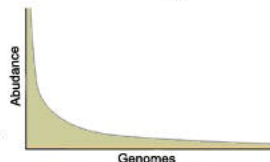

4) Calculate the Euclidean distance between the n selected genomes and the metagenome

$$d(p, q) = \sqrt{\sum_{i=1}^n (q_i - p_i)^2}$$

List of "Known" genomes in the "Unknowns"

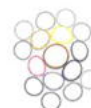

Repeat  
n times

Simulated data (250 x 10<sup>4</sup> Iterations)

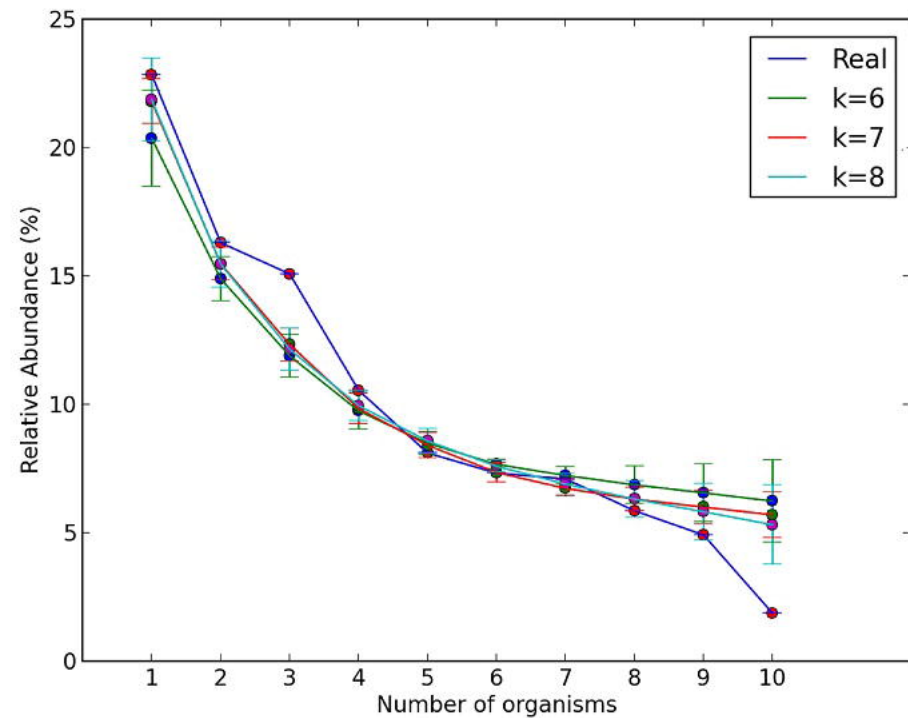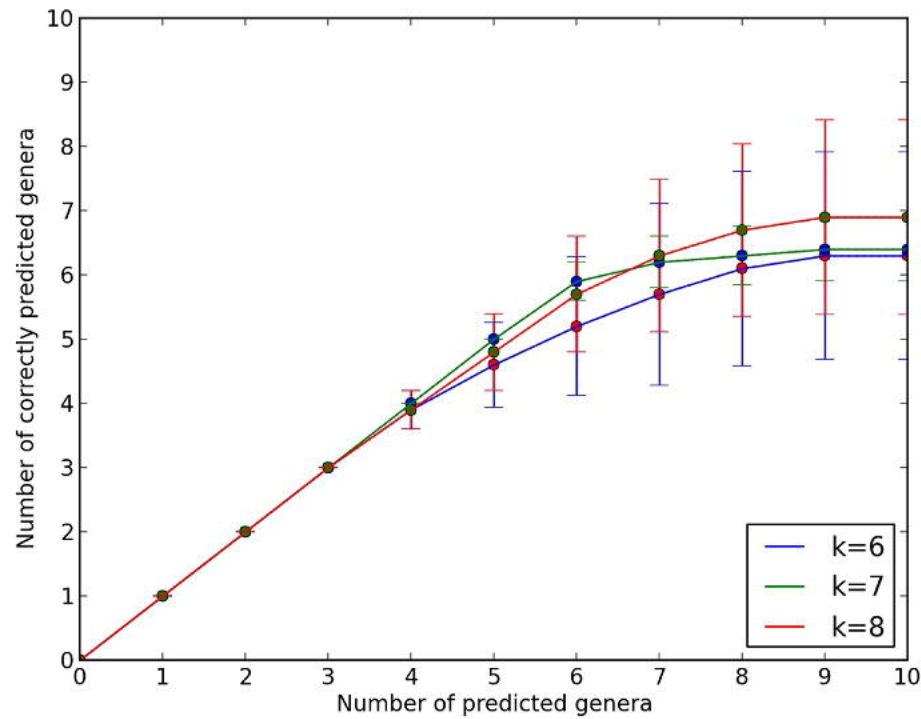

Simulated data (250 x 10<sup>5</sup> Iterations)

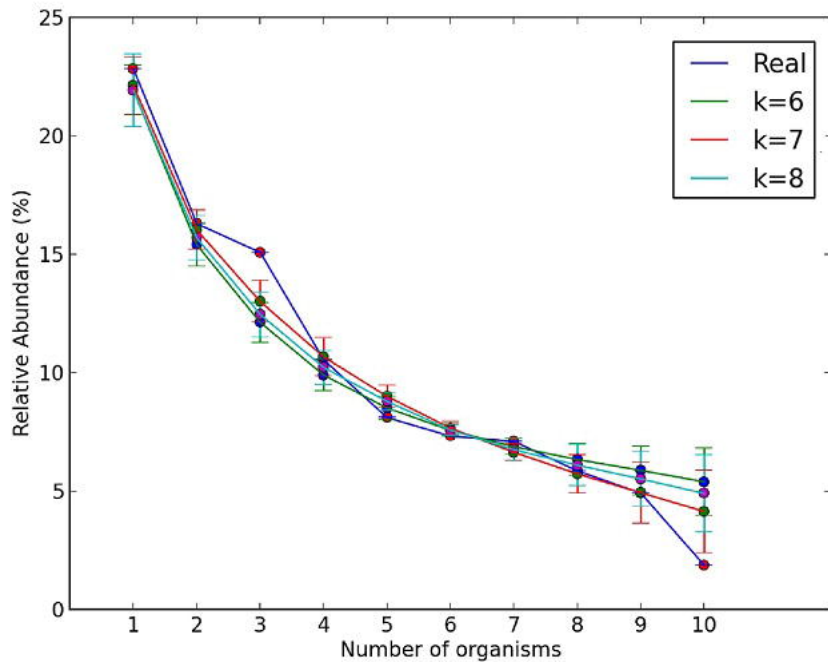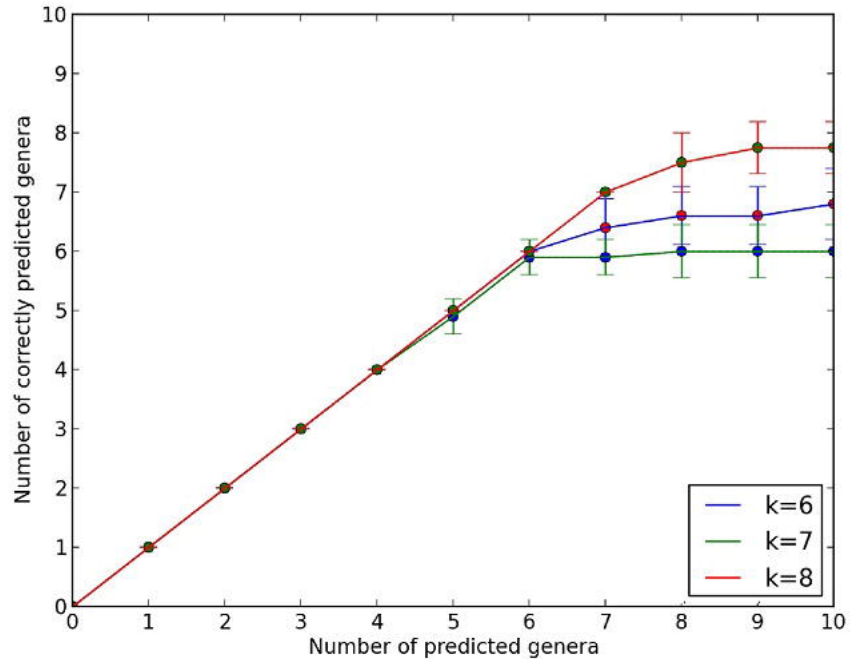

Total Running Time

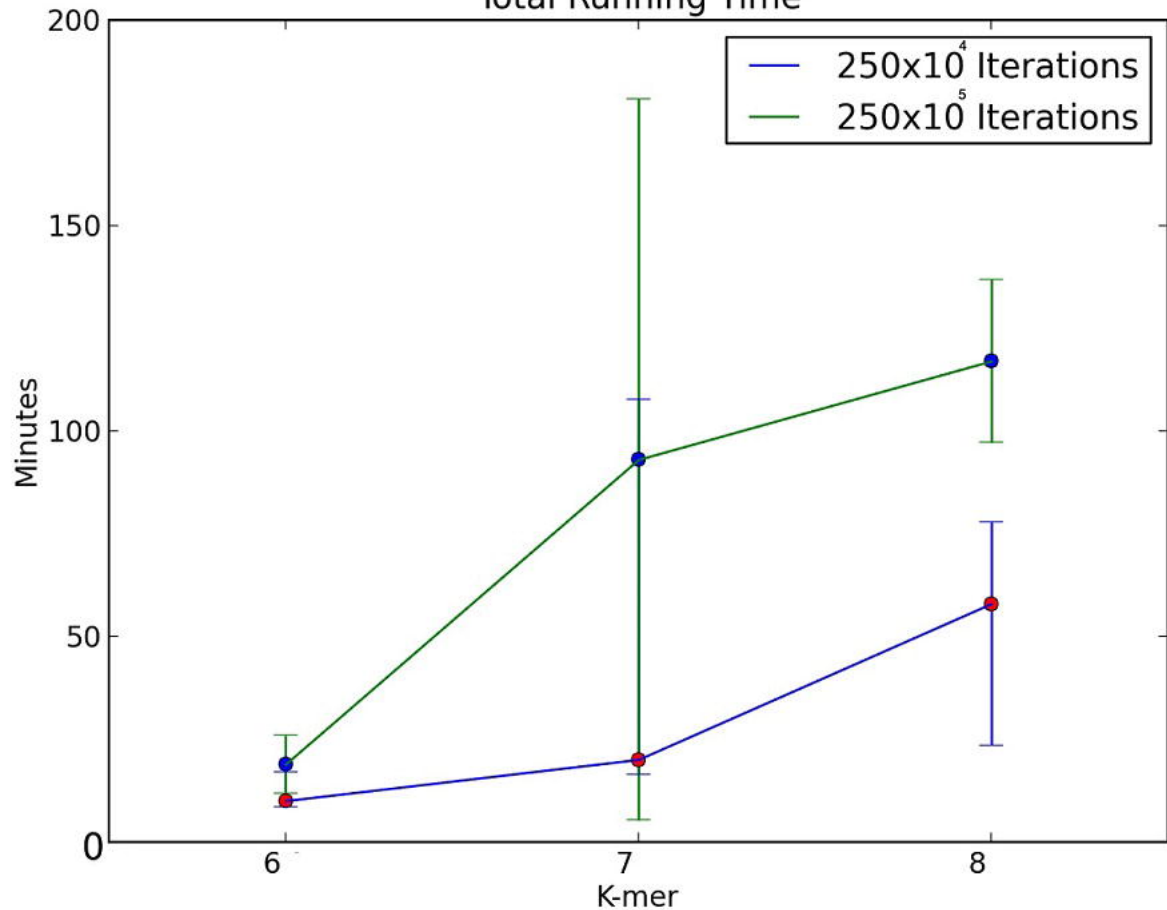

Source: http://biorxiv.org/content/10.1101/010801v1.full.pdf
